# Supplementary material for: Construction of a double-walled carbon nanoring
Source: Royal Society of Chemistry journal article supplement (doi:10.1039/d0nr08931a), 2021-01-01
Supplement: d0nr08931a1.pdf [file d0nr08931a1.pdf]

## Construction of A Double-Walled Carbon Nanoring

Chong Zhao, Fupin Liu, Lai Feng, Mingzhe Nie, Yuxi Lu, Jie Zhang, Chunru Wang, and Taishan Wang\*

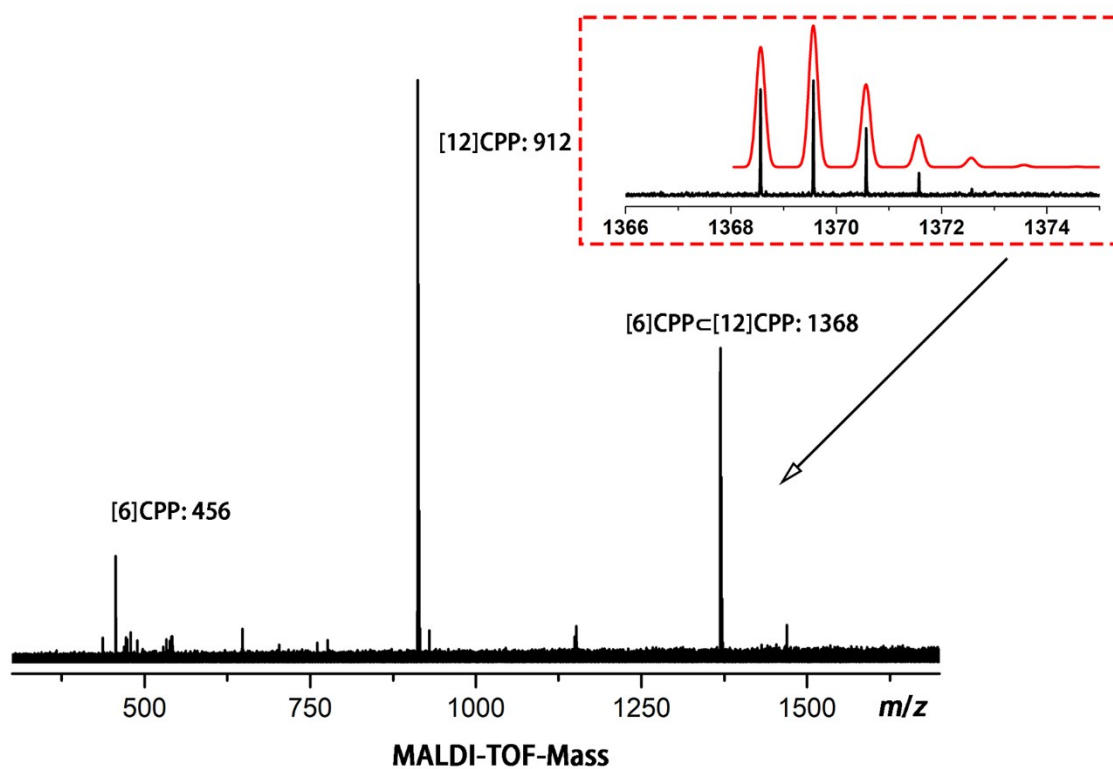

**Figure S1.** High resolution MALDI-TOF mass spectrum of [6]CPP<[12]CPP.

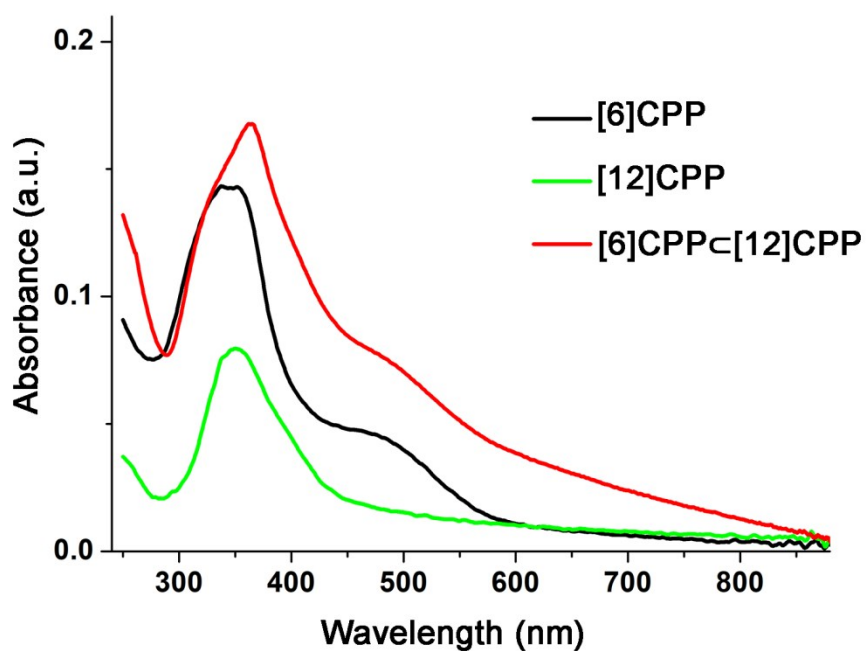

**Figure S2.** UV-Vis spectra of [6]CPP, [12]CPP, and [6]CPP<[12]CPP films. The thin film was spin-coated (60  $\mu$ L) on the quartz glass substrate using the samples with the same concentration of  $1.0 \times 10^{-3}$  mol/L in  $\text{CH}_2\text{Cl}_2$ .

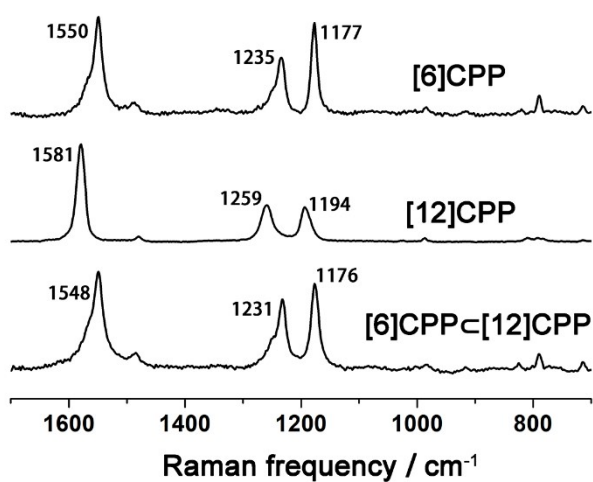

**Figure S3.** Raman spectra of [6]CPP, [12]CPP, and [6]CPP<[12]CPP in solid state.

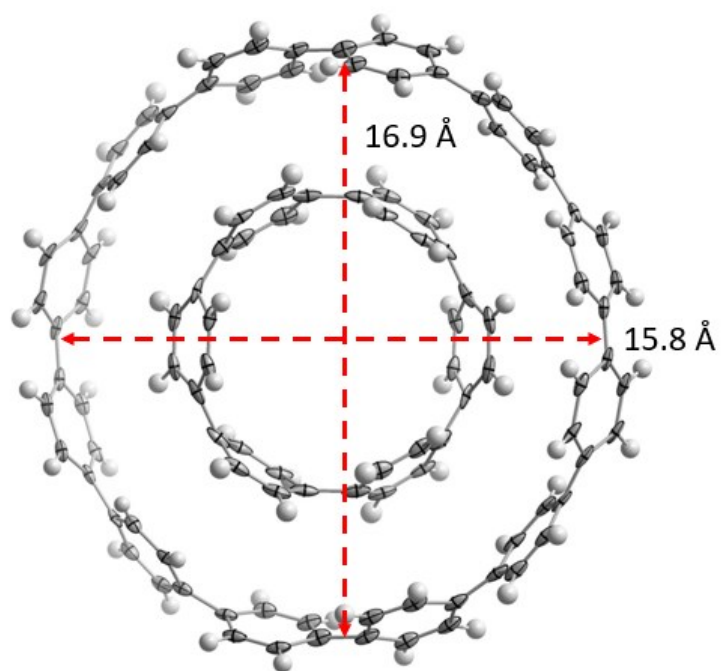

**Figure S4.** The long and short axes of the ellipse [6]CPP/[12]CPP crystalline structure.

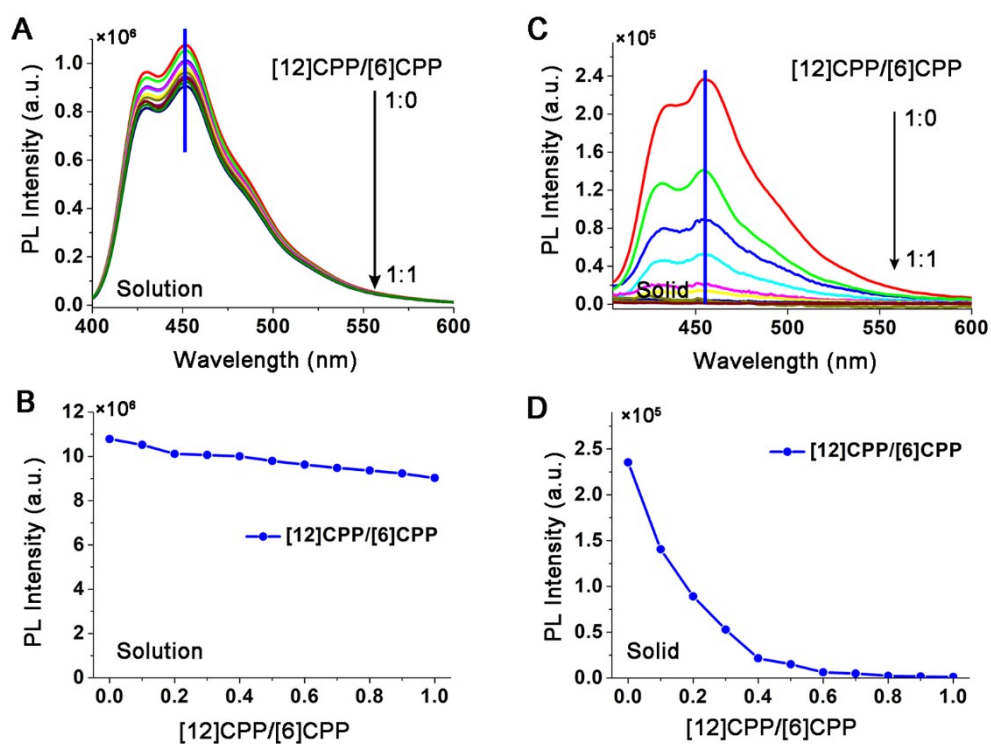

**Figure S5.** Fluorescence titrations of [12]CPP with increasing amounts of [6]CPP in CH<sub>2</sub>Cl<sub>2</sub> solution and solid states following titration experiments. (a) Solution state titration and (b) the job plot of [12]CPP (1.5 M) with 0 ~ 1.5 M [6]CPP. (c) Solid state titration and (d) the job plot of [12]CPP (1.5 M) with 0 ~ 1.5 M [6]CPP. The  $\lambda_{\text{exc}}$  is 385 nm, and the job plots were monitored at 460 nm.

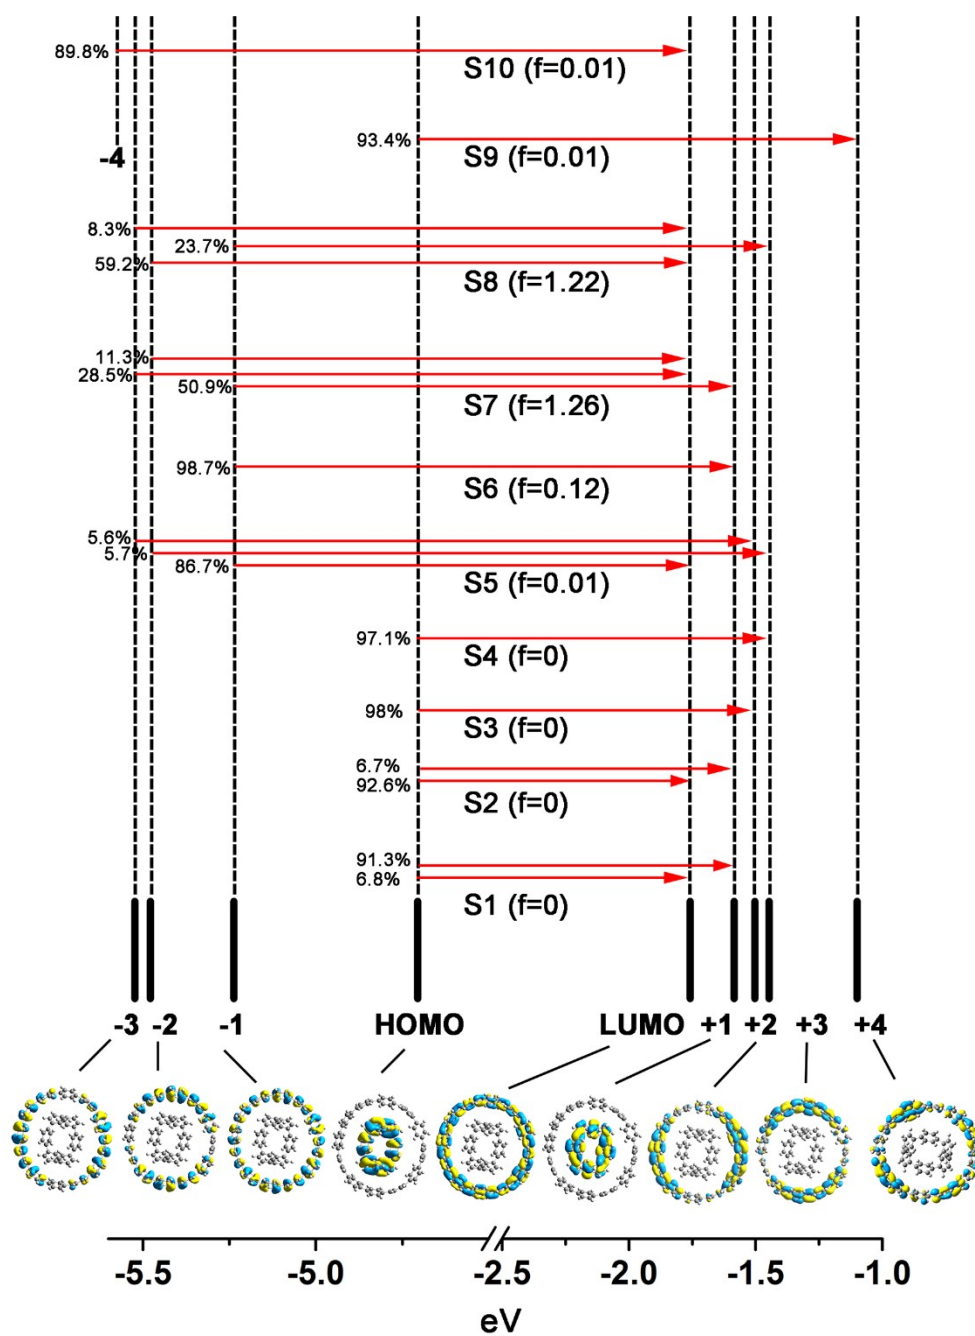

**Figure S6.** MOs and orbital visualizations of the calculated front 10 vertical excited states.

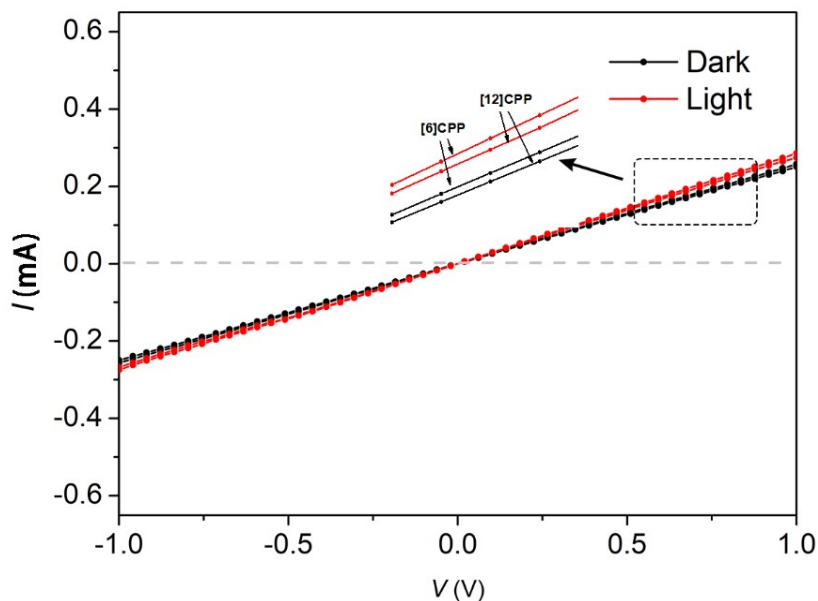

**Figure S7.**  $I$ - $V$  profiles of the [6]CPP and [12]CPP with (red) and without (black) photoirradiation.

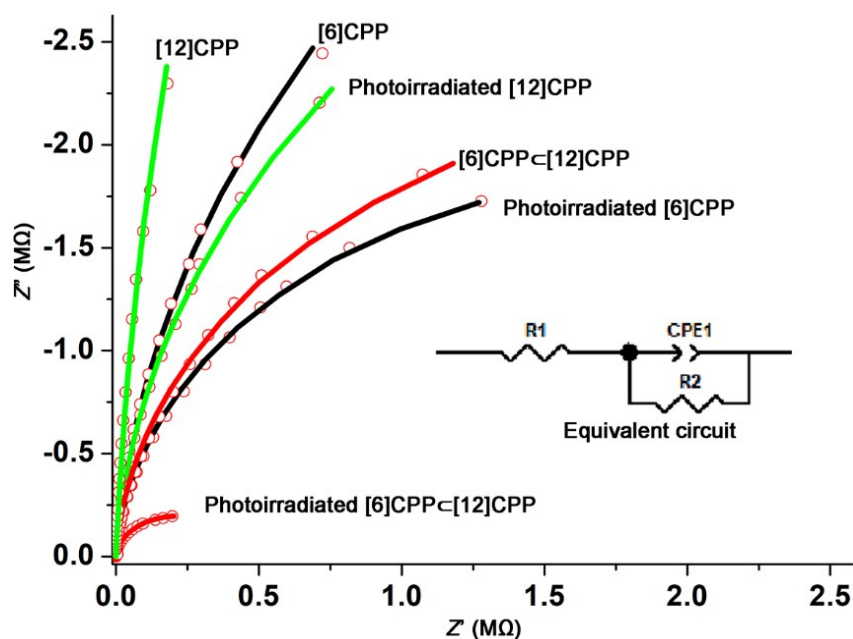

**Figure S8.** Nyquist plots before and after the photoirradiation applied to [6]CPP (black), [12]CPP (green), and [6]CPP/[12]CPP (red) films. Inset is the simulated equivalent circuit.

**Table S1.** Simulated impedance results for the plots before and after the photoirradiation. Unit,  $\Omega \text{ cm}^2$ .

|                  | [12]CPP            | [6]CPP             | [6]CPP<[12]CPP     |
|------------------|--------------------|--------------------|--------------------|
| Dark             | $5.75 \times 10^7$ | $1.18 \times 10^7$ | $4.65 \times 10^6$ |
| Photoirradiation | $8.78 \times 10^6$ | $3.87 \times 10^6$ | $4.24 \times 10^5$ |

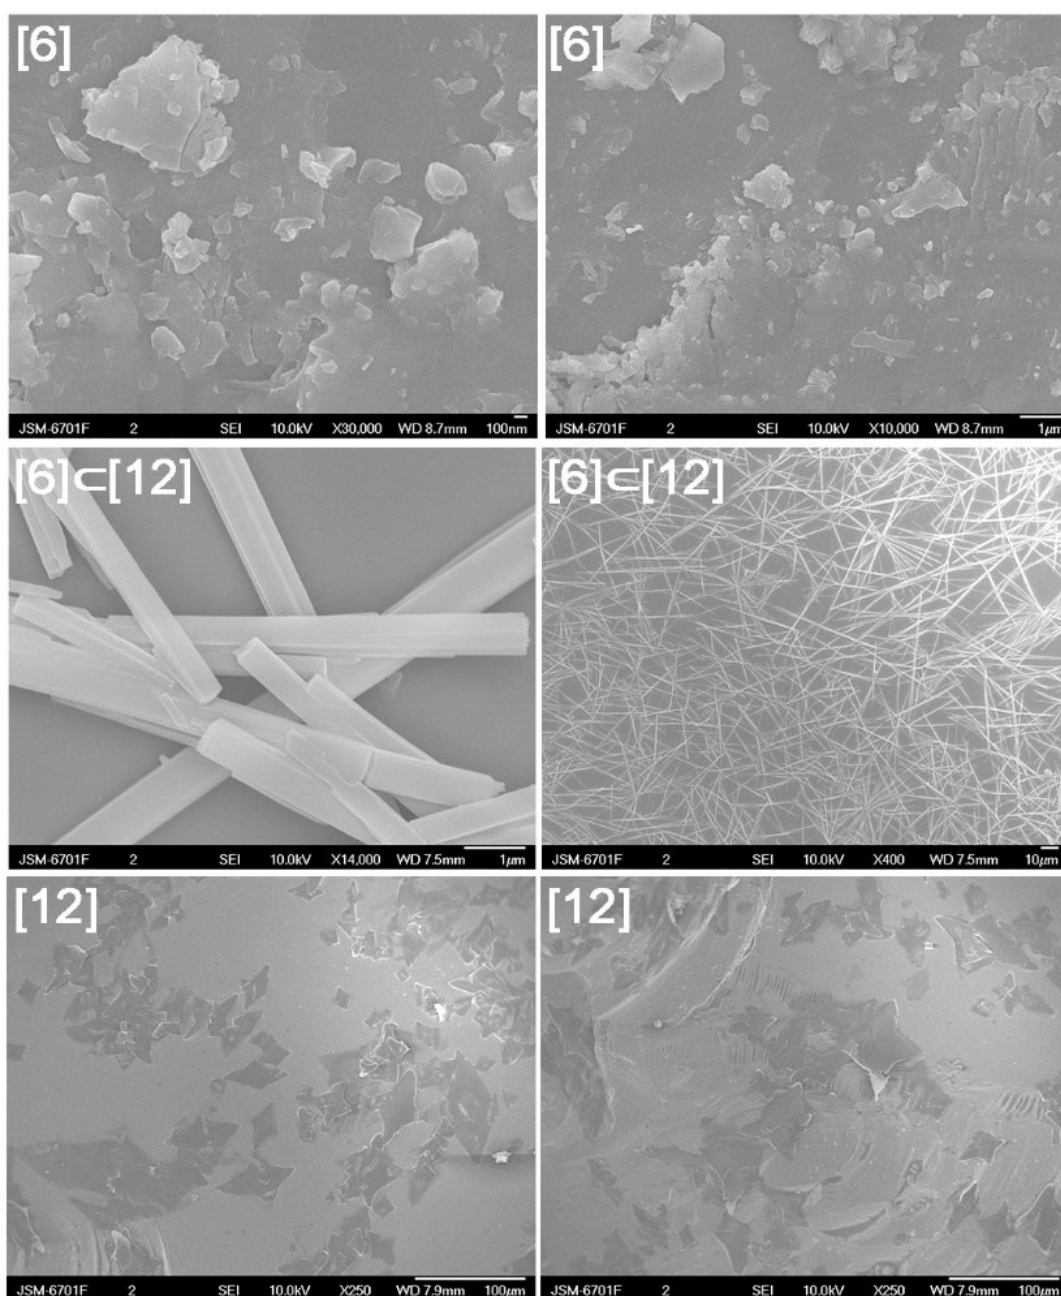



**Figure S9.** SEM images of [6]CPPs, [12]CPP, and [6]CPPs<[12]CPP complexes in DMF solution.

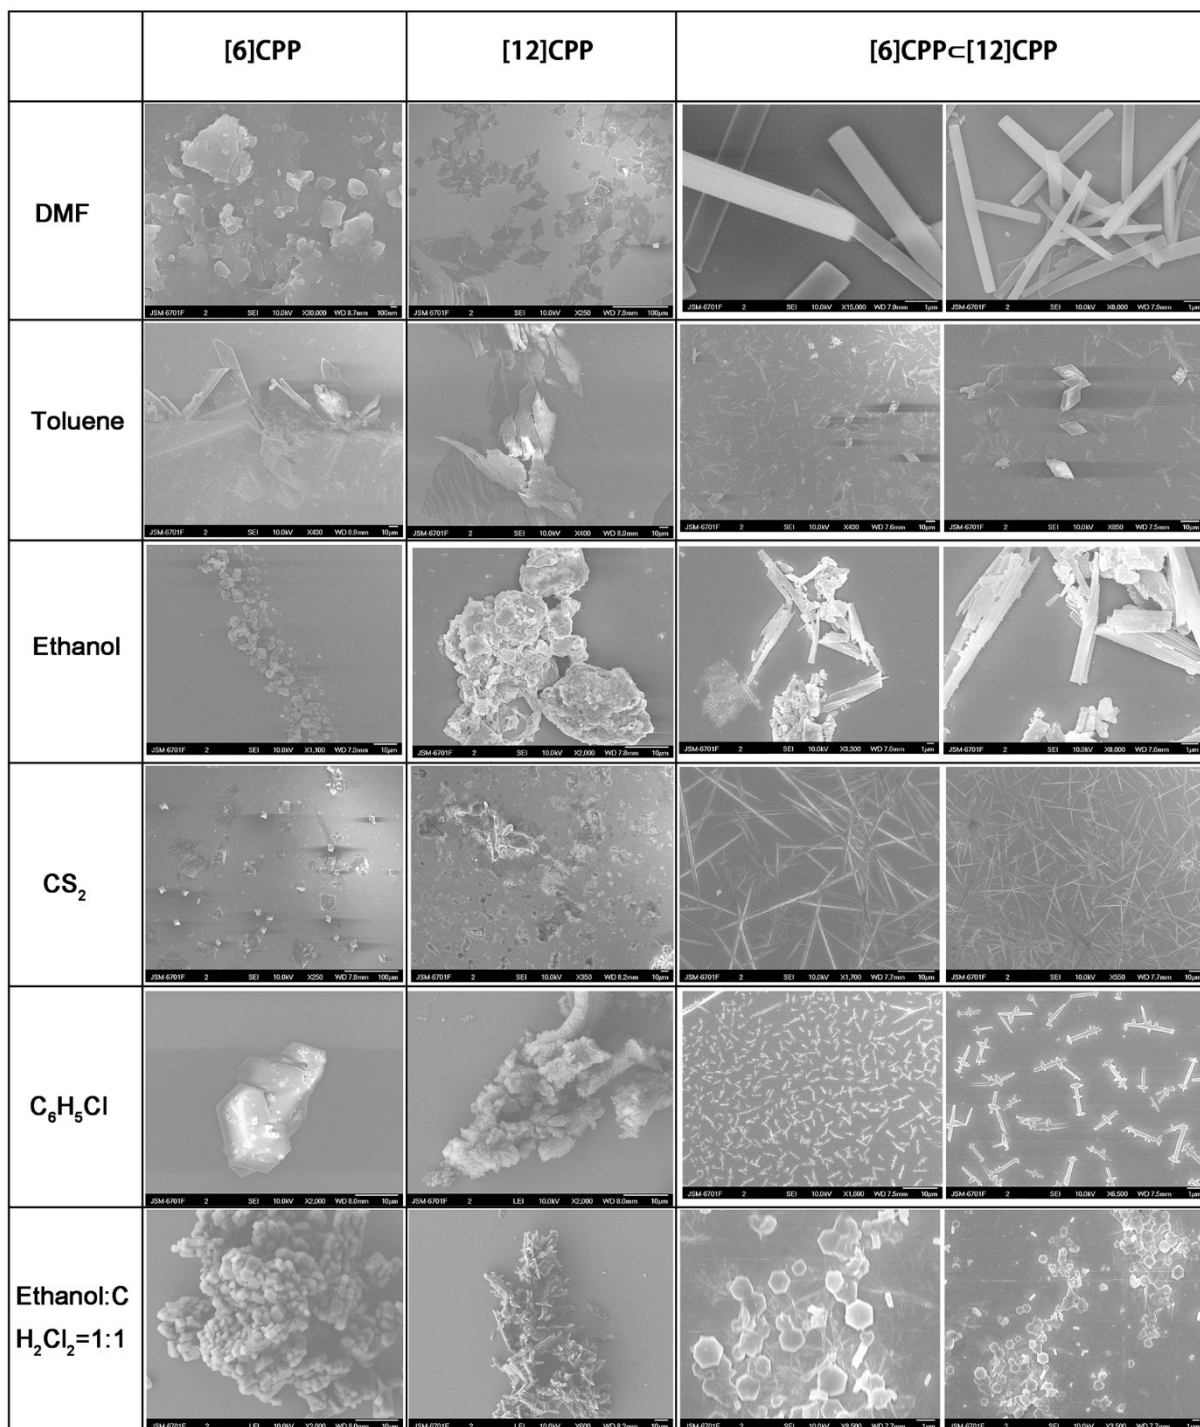

**Figure S10.** SEM images of [6]<[12]CPP complex in different solutions.

Structures\_[6]CPP<[12]CPP

X-ray diffraction data collection was carried out using a diffractometer (Rigaku Saturn724+) equipped with a CCD collector. The structure was solved by direct methods and refined by SHELXL-2018.<sup>[1]</sup> Hydrogen atoms were added geometrically, and refined with a riding model. The crystal data are presented in Table S2.

**Figure 2a** presents the packing of the [6]CPP⊂[12]CPP molecules in the crystal lattice, the dichloromethane molecules are located in the voids of the [12]CPP molecules, the severely disordered solvent molecules are observed to locate in the center of the [6]CPP molecules, which is masked with SQUEEZE code in the refinement.<sup>[2]</sup> The angle between [6]CPP and [12]CPP evaluated with dihedral angle of the least squares planes pass through the [6]CPP/[12]CPP is 26.7(5)°.

**Table S2. Crystal data \_[6]CPP⊂[12]CPP.**

| <b>Crystal</b>                              | <b>6CPP⊂12CPP</b>                               |
|---------------------------------------------|-------------------------------------------------|
| <b>Formula</b>                              | C <sub>55</sub> H <sub>38</sub> Cl <sub>2</sub> |
| <b>Formula weight</b>                       | 769.75                                          |
| <b>Color, habit</b>                         | yellow, block                                   |
| <b>Crystal system</b>                       | monoclinic                                      |
| <b>Space group</b>                          | P2 <sub>1</sub> /c                              |
| <i>a</i> , Å                                | 6.2639(6)                                       |
| <i>b</i> , Å                                | 22.294(2)                                       |
| <i>c</i> , Å                                | 30.280(4)                                       |
| <i>α</i> , deg                              | 90                                              |
| <i>β</i> , deg                              | 95.509(10)                                      |
| <i>γ</i> , deg                              | 90                                              |
| <b>Volume, Å<sup>3</sup></b>                | 4209.0(8)                                       |
| <b><i>Z</i></b>                             | 4                                               |
| <b><i>T</i>, K</b>                          | 170                                             |
| <b>Radiation (λ, Å)</b>                     | Mo K-α (0.71073)                                |
| <b>Unique data (<i>R</i><sub>int</sub>)</b> | 9593 (0.2142)                                   |
| <b>Parameters</b>                           | 515                                             |



|                                                       |         |
|-------------------------------------------------------|---------|
| <b>Restraints</b>                                     | 366     |
| <b>Observed data (<math>I &gt; 2\sigma(I)</math>)</b> | 2971    |
| <b><math>R_I^a</math> (observed data)</b>             | 0.1876  |
| <b><math>wR_2^b</math> (all data)</b>                 | 0.4620  |
| <b>CCDC NO.</b>                                       | 2013130 |

---

<sup>a</sup>For data with  $I > 2\sigma(I)$ ,  $R_1 = \frac{\sum ||F_o| - |F_c||}{\sum |F_o|}$ . <sup>b</sup>For all data,  $wR_2 = \sqrt{\frac{\sum [w(F_o^2 - F_c^2)^2]}{\sum [w(F_o^2)^2]}}$ .

## Reference:

- [1] G. Sheldrick, *Acta Cryst. C* **2015**, 71, 3.
- [2] A. Spek, *Acta Cryst. C* **2015**, 71, 9.
